# Supplementary material
Source: PubMed Central journal article supplement (PMC2775053)

Supplemental Data

|          |     |                                                                |
|----------|-----|----------------------------------------------------------------|
| XL_Kif2a | 1   | ARPIQPIEQSASRQONGSVSDISPDPGKKDFGLASRRKSNCVKEVEKLQEKRERRRLOQ    |
| HS_Kif2a | 1   | ARPSQPFPEQSSSAQONGSVSDISPVQAAKKEFGPPSRRKSNCVKEVEKLQEKREKRRLOQ  |
| XL_Kif2a | 61  | QELREKKAQDFDATNPNYEIMCMIKDFRGS�DYRPLTTS DPIDEHRICVCVRKRPLNKKE  |
| HS_Kif2a | 61  | QELREKRAQDV DATNPNYEIMCMI RDFRGS�DYRPLTTADPIDEHRICVCVRKRPLNKKE |
| XL_Kif2a | 121 | TTIKDLDVITIPISKDVVMVHEPKQKVDLTRFLENQTFRFDYAFDETAPNETVYRFTARPL  |
| HS_Kif2a | 121 | TQMKDLDVITIPSKDVVMVHEPKQKVDLTRYLENQTFRFDYAFDD SAPNEMVYRFTARPL  |
| XL_Kif2a | 181 | VETIFERGMATCFAYGQTGSGKTHTMGGDFSGKNQDCSKGIYALAARDVFM LKPKPNYKK  |
| HS_Kif2a | 181 | VETIFERGMATCFAYGQTGSGKTHTMGGDFSGKNQDCSKGIYALAARDVFLMLKPKPNYKK  |
| XL_Kif2a | 241 | LELQVYATFFEIYSGKVFLLNRKTKLRVLEDGKQOVQVVGLQEREVKCVEDVLKLI EIG   |
| HS_Kif2a | 241 | LELQVYATFFEIYSGKVFLLNRKTKLRVLEDGKQOVQVVGLQEREVKCVEDVLKLIDIG    |
| XL_Kif2a | 301 | NSCRTSGQTSANAHSSRSHAVFOIILRKKGKMHGKFSLIDLAGNERGADTSSADRQTRLE   |
| HS_Kif2a | 301 | NSCRTSGQTSANAHSSRSHAVFOIILRRKGK L HGKFSLIDLAGNERGADTSSADRQTRLE |
| XL_Kif2a | 361 | GAEINKSLLALKECIRALGRNKPHTPPFRASKLTQVLRDSFIGENSRTCMIAT          |
| HS_Kif2a | 361 | GAEINKSLLALKECIRALGRNKPHTPPFRASKLTQVLRDSFIGENSRTCMIAT          |

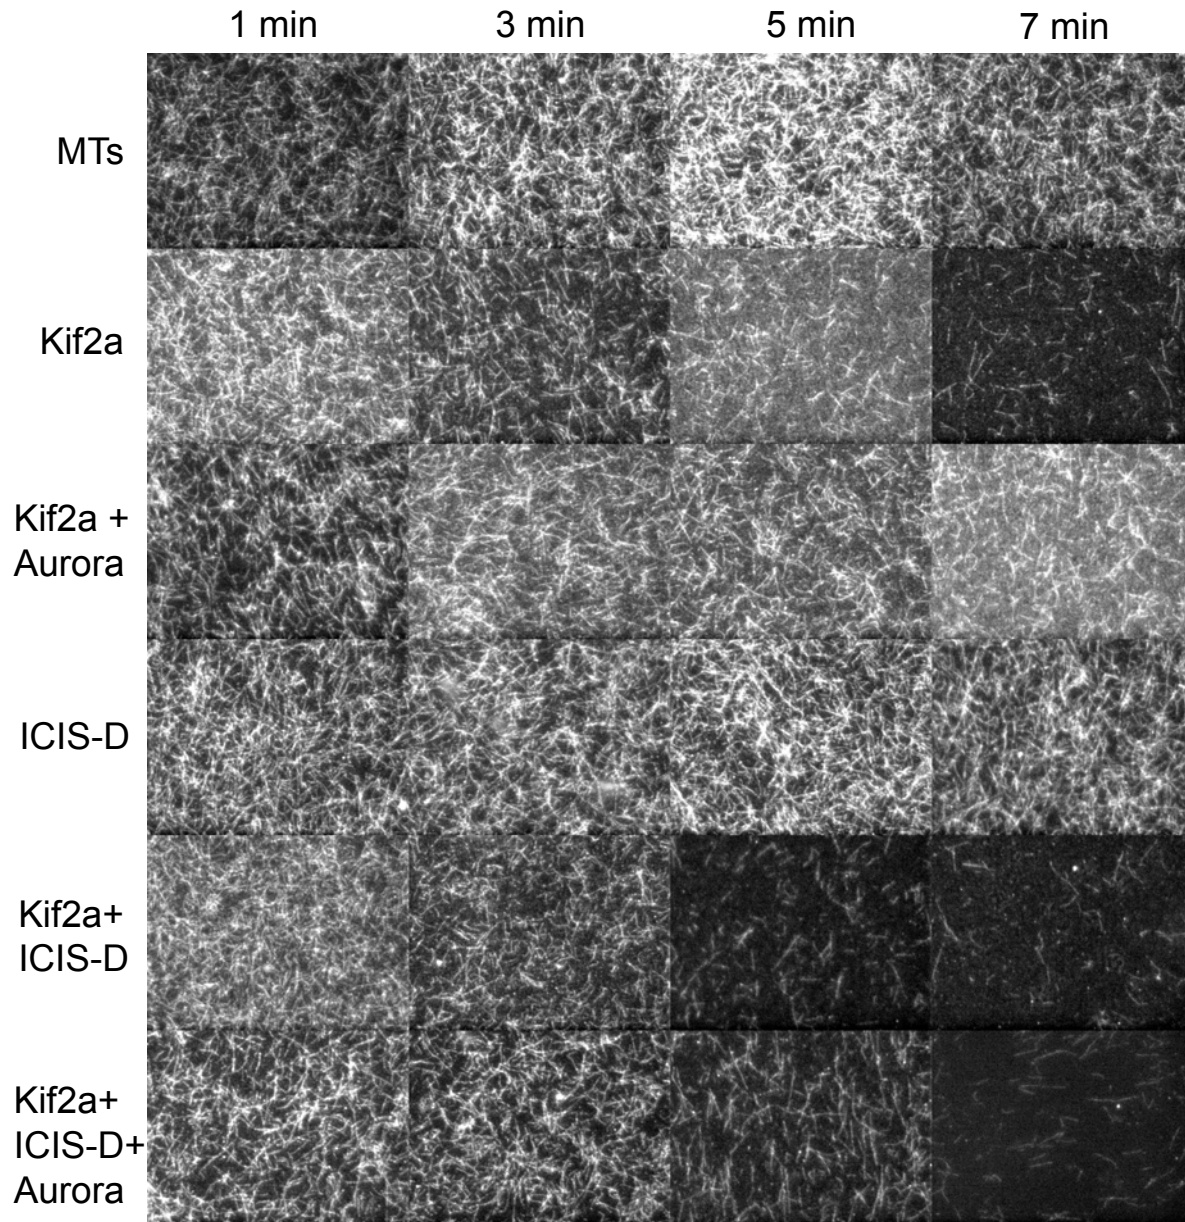

Knowlton and Vorozhko, Supplemental Figure 2

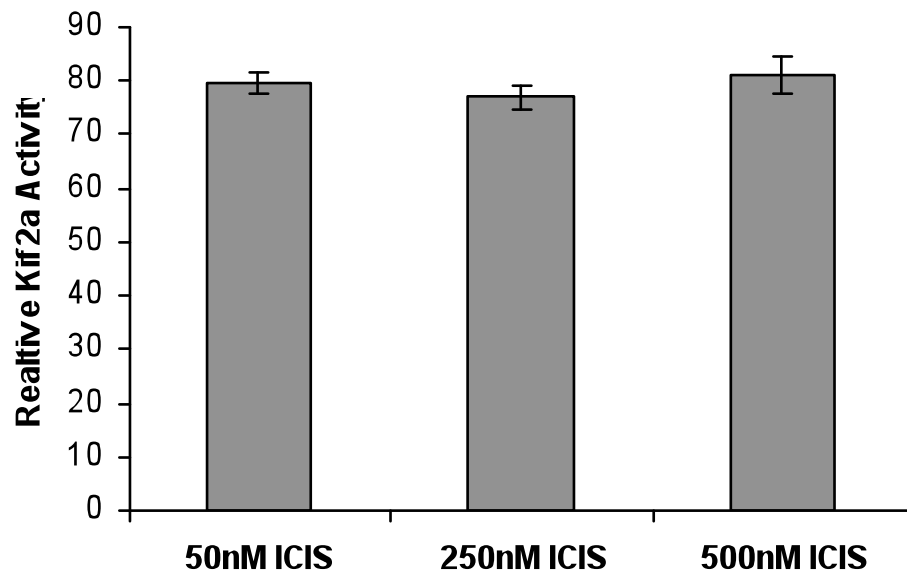

Knowlton and Vorozhko et al., Supplemental Figure 3

**A**

xMCAK 191-QGRRKSNIVKE  
xKif2A 127-ASRRKSNCVKE

**B**

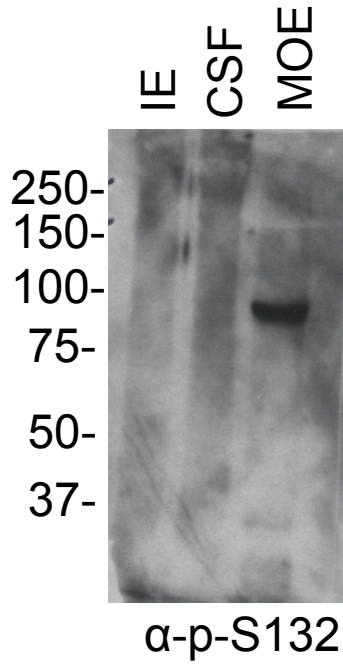

Knowlton and Vorozhko et al. Supplemental Figure 4

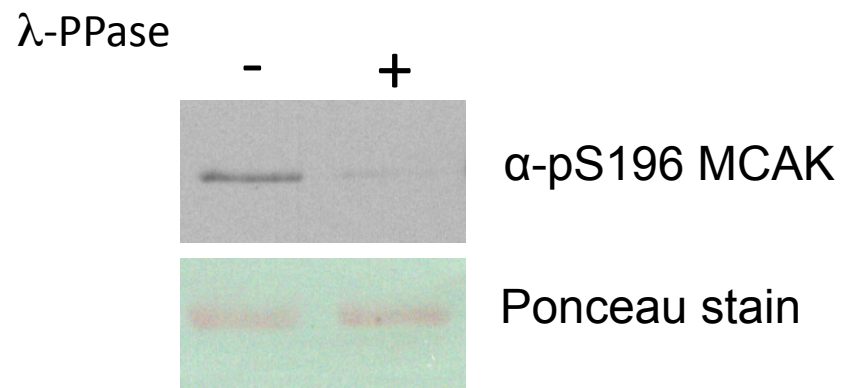

Knowlton and Vorozhko, Supplemental Figure 5

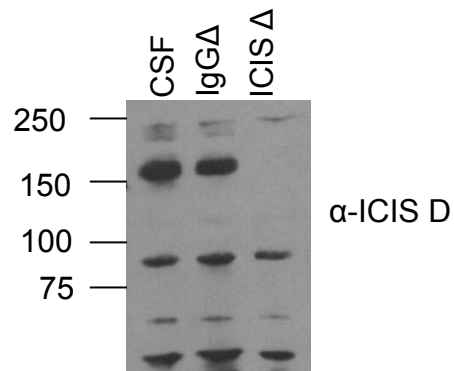

**Knowlton and Vorozhko et al., Supplemental Figure 6**

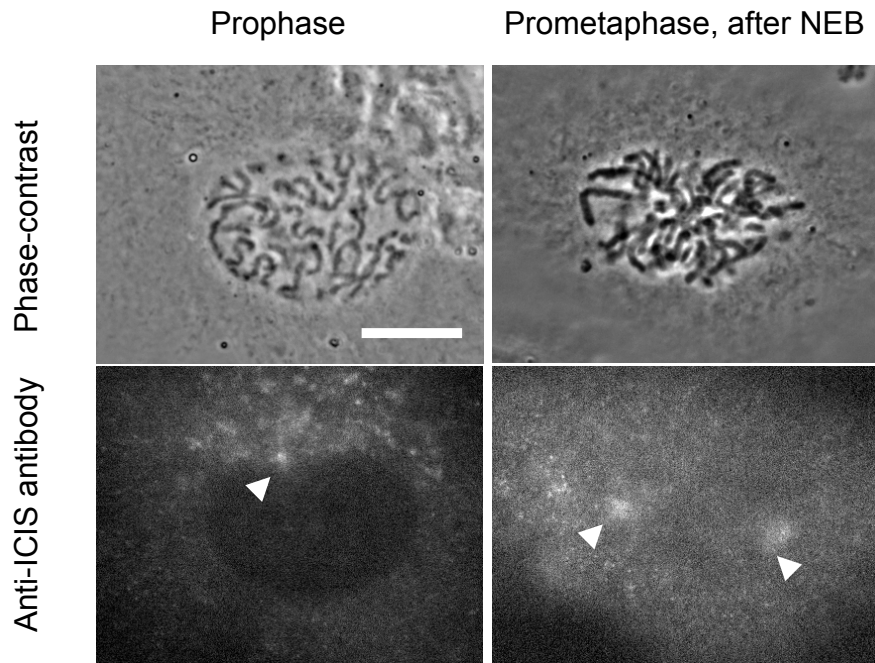

Knowlton and Vorozhko et al. Supplemental Figure 7

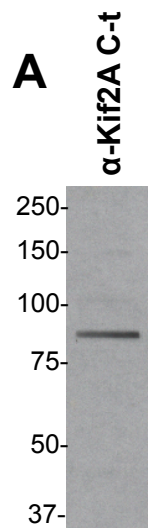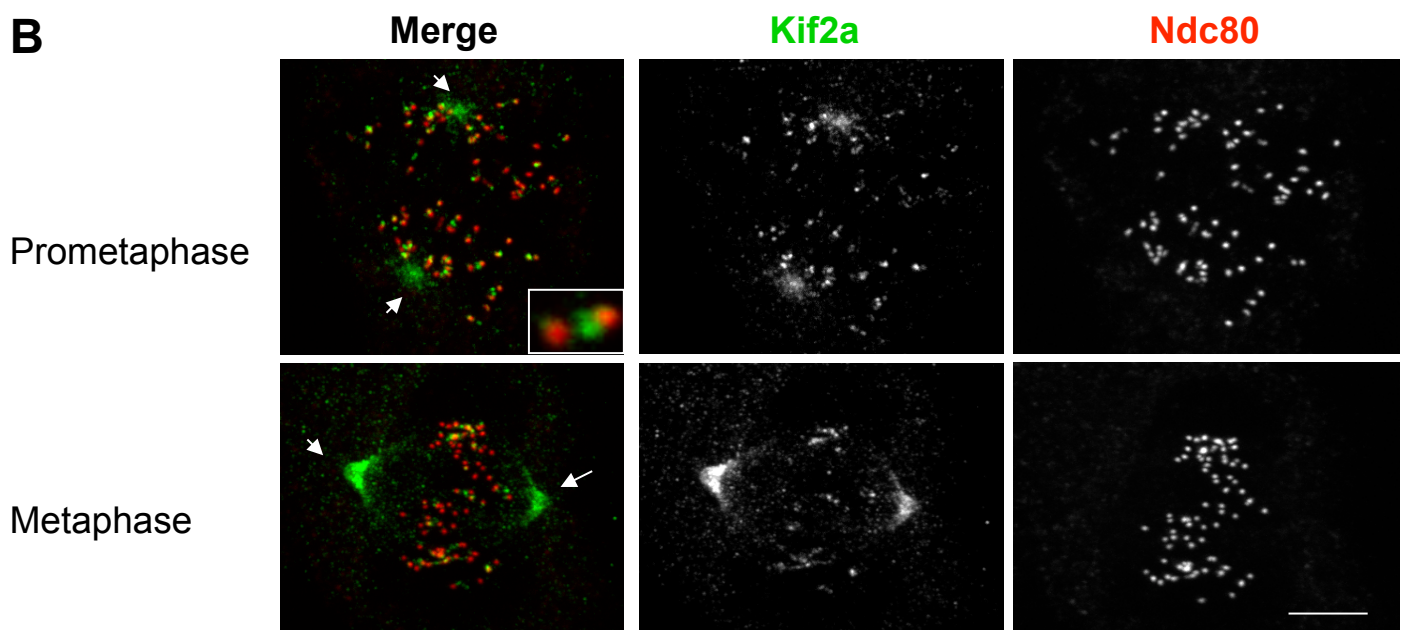

Supplement: NIHMS118070-supplement-01.pdf [file NIHMS118070-supplement-01.pdf]
